# Supplementary material for: MRI-Based Investigation of Skin-Epidural Distance and Posterior Epidural Space Depth: The Role of Demographic and Anthropometric Factors
Source: Research Square preprint supplement (doi:10.21203/rs.3.rs-6675174/v1), 2025-06-17
Supplement: Supplementary file 1 [file 82e5e406aba448673183e9ba.docx]

# Data Collection Form

## Section 1: Demographic and Anthropometric Information

Patient ID: ___________

Age (years): ___________

Sex: ☐ Male ☐ Female

Height (cm): ___________

Weight (kg): ___________

BMI (kg/m²): ___________

## Section 2: MRI-Based Measurements

For each level, record the following parameters:

| Spinal Level | Skin-to-Epidural Distance (SED, mm) | Posterior Epidural Space Depth (PESD, mm) |
| --- | --- | --- |
| L2–L3 | __________ | __________ |
| L3–L4 | __________ | __________ |
| L4–L5 | __________ | __________ |
| L5–S1 | __________ | __________ |
